# Supplementary material for: Non-medicinal parts of safflower (bud and stem) mediated sustainable green synthesis of silver nanoparticles under ultrasonication: optimization, characterization, antioxidant, antibacterial and anticancer potential
Source: Royal Society of Chemistry journal article supplement (doi:10.1039/d2ra06414f), 2022-01-01
Supplement: d2ra06414f1.pdf [file d2ra06414f1.pdf]

Supporting Information for

**Non-medicinal Parts of Safflower (Bud and Stem) Mediated Sustainable Green Synthesis of Silver Nanoparticles under Ultrasonic: Optimization, Characterization, Antioxidant, Antibacterial and Anticancer Potential**

Simin Wei,<sup>a</sup> Mengke Hao,<sup>a</sup> Zhishu Tang,<sup>\*a</sup> Tuan Zhou,<sup>a</sup> Fei Zhao,<sup>b</sup> Yinghui Wang<sup>\*c</sup>

<sup>a</sup> State Key Laboratory of Research & Development of Characteristic Qin Medicine Resources (Cultivation), Co-Construction Collaborative Innovation Center for Chinese Medicine Resources Industrialization by Shaanxi & Education Ministry, Shaanxi University of Chinese Medicine, Xianyang 712083, China

<sup>b</sup> College of Basic Medical Sciences, Shaanxi University of Chinese Medicine, Xianyang 712046, China

<sup>c</sup> College of Science, Chang'an University, Xi'an 710064, China

## **Table of Contents**

**Figure S1** Fluorescence micrographs

**Table S1** Average size of SS-AgNPs at different pH and incubation time

**Table S2** Average size of SS-AgNPs at different material ratio

**Table S3** Average size of SB-AgNPs at different pH and incubation time

**Table S4** Average size of SB-AgNPs at different material ratio

**Table S5** Polydispersity index of SS-AgNPs at different pH and incubation time

**Table S6** Polydispersity index of SS-AgNPs at different material ratio

**Table S7** Polydispersity index of SB-AgNPs at different pH and incubation time

**Table S8** Polydispersity index of SB-AgNPs at different material ratio

**Table S9** Zeta potential of SS-AgNPs and SB-AgNPs at different pH

**Table S10** Zeta potential of SB-AgNPs at different material ratio

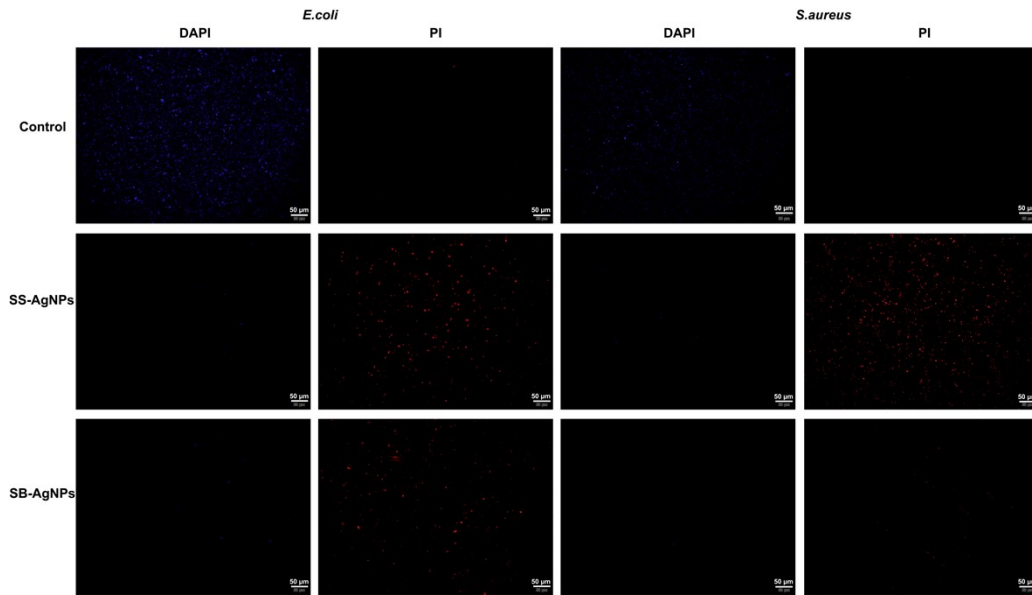

**Figure S1** Fluorescence micrographs of *E. coli* and *S. aureus* after incubating with DAPI and PI.

**Table S1** Average size of SS-AgNPs synthesized with different process parameters (5.0 mL SS extract and 5.0 mL 10 mM AgNO<sub>3</sub>)

| Times (h) \ pH | Average size/nm |          |          |          |          |          |           |
|----------------|-----------------|----------|----------|----------|----------|----------|-----------|
|                | 4.0             | 5.0      | 6.0      | 7.0      | 8.0      | 9.0      | 10.0      |
| 1.0            | -               | -        | -        | 81.4±1.2 | 44.1±1.1 | 76.0±1.0 | 40.6±8.0  |
| 2.0            | -               | -        | -        | 73.8±1.0 | 62.7±4.9 | 87.5±0.5 | 63.2±9.2  |
| 3.0            | 71.5±0.3        | 65.0±1.8 | 44.0±0.2 | 20.5±0.3 | 31.0±2.3 | 48.6±0.6 | 100.8±8.0 |
| 4.0            | 73.6±1.2        | 40.4±1.7 | 24.7±0.1 | 45.1±0.4 | 26.2±0.1 | 54.8±1.2 | 37.5±6.3  |
| 5.0            | 85.4±0.8        | 47.7±0.6 | 40.6±1.7 | 29.1±2.7 | 48.7±2.0 | 56.9±0.6 | 28.4±9.8  |
| 6.0            | 93.0±1.1        | 66.9±3.0 | 32.9±1.0 | 30.3±0.3 | 19.7±0.8 | 21.9±0.3 | 90.0±1.7  |

**Table S2** Average size of SS-AgNPs synthesized with different material ratio (at pH 10.0 after incubation 4.0 h)

| Extract: AgNO <sub>3</sub> | Average size/nm |
|----------------------------|-----------------|
| 1:1                        | 48.2±1.2        |
| 1:2                        | 34.3±1.3        |
| 1:3                        | 90.3±0.6        |
| 1:4                        | 93.3±0.1        |
| 1:5                        | 92.4±1.0        |
| 1:10                       | 106.8±1.3       |
| 1:20                       | 125.2±0.9       |

**Table S3** Average size of SB-AgNPs synthesized with different process parameters (5.0 mL SB extract and 5.0 mL 10 mM AgNO<sub>3</sub>)

| Times (h) \ pH | Average size/nm |            |            |           |          |          |
|----------------|-----------------|------------|------------|-----------|----------|----------|
|                | 5.0             | 6.0        | 7.0        | 8.0       | 9.0      | 10.0     |
| 4.0            | -               | -          | -          | -         | 34.1±1.2 | 26.2±2.6 |
| 5.0            | -               | -          | -          | -         | 30.2±2.8 | 54.4±0.6 |
| 6.0            | -               | -          | -          | -         | 32.8±3.3 | 26.5±1.5 |
| 8.0            | 673.9±7.6       | 241.5±6.1  | 171.0±0.8  | 103.8±0.8 | 47.5±1.0 | 43.8±0.3 |
| 9.0            | 373.5±28.7      | 473.4±8.2  | 219.1±8.8  | 116.6±4.7 | 63.4±1.1 | 50.8±0.5 |
| 10.0           | 330.3±5.1       | 380.4±15.8 | 269.0±30.8 | 113.1±0.8 | 90.1±4.4 | 33.0±1.2 |
| 12.0           | 591.1±59.2      | 358.5±7.1  | 214.8±9.3  | 162.5±3.5 | 48.3±0.8 | 30.1±0.2 |

**Table S4** Average size of SB-AgNPs synthesized with different material ratio (at pH 10.0 after incubation 6.0 h)

| Extract: AgNO <sub>3</sub> | Average size/nm |
|----------------------------|-----------------|
| 1:1                        | 23.5±0.3        |
| 1:2                        | 165.4±2.2       |
| 1:3                        | 153.3±2.7       |
| 1:4                        | 132.3±3.7       |
| 1:5                        | 140.7±0.7       |
| 1:10                       | 98.7±0.1        |
| 1:20                       | 83.0±0.6        |

**Table S5** PDI of SS-AgNPs synthesized with different process parameters (5.0 mL SS extract and 5.0 mL 10 mM AgNO<sub>3</sub>)

| Times (h) \ pH | Polydispersity index/PDI |           |           |           |           |           |           |
|----------------|--------------------------|-----------|-----------|-----------|-----------|-----------|-----------|
|                | 4.0                      | 5.0       | 6.0       | 7.0       | 8.0       | 9.0       | 10.0      |
| 1.0            | -                        | -         | -         | 0.44±0.03 | 0.47±0.01 | 0.40±0.01 | 0.39±0.06 |
| 2.0            | -                        | -         | -         | 0.46±0.01 | 0.72±0.07 | 0.31±0.01 | 0.32±0.09 |
| 3.0            | 0.23±0.01                | 0.47±0.03 | 0.28±0.01 | 0.69±0.01 | 0.52±0.02 | 0.54±0.01 | 0.29±0.06 |
| 4.0            | 0.24±0.01                | 0.39±0.07 | 0.55±0.01 | 0.34±0.04 | 0.55±0.01 | 0.51±0.03 | 0.36±0.02 |
| 5.0            | 0.28±0.03                | 0.33±0.04 | 0.39±0.07 | 0.78±0.06 | 0.48±0.06 | 0.54±0.01 | 0.34±0.08 |
| 6.0            | 0.22±0.01                | 0.44±0.01 | 0.46±0.02 | 0.54±0.01 | 0.59±0.03 | 0.60±0.01 | 0.38±0.05 |

**Table S6** PDI of SS-AgNPs synthesized with different material ratio (at pH 10.0 after incubation 4.0 h)

| Extract: AgNO <sub>3</sub> | Polydispersity index/PDI |
|----------------------------|--------------------------|
| 1:1                        | 0.39±0.05                |
| 1:2                        | 0.39±0.06                |
| 1:3                        | 0.26±0.01                |
| 1:4                        | 0.29±0.04                |
| 1:5                        | 0.27±0.01                |
| 1:10                       | 0.24±0.01                |
| 1:20                       | 0.20±0.02                |

**Table S7** PDI of SB-AgNPs synthesized with different process parameters (5.0 mL SS extract and 5.0 mL 10 mM AgNO<sub>3</sub>)

| pH \ Times (h) | Polydispersity index/PDI |           |           |           |           |           |
|----------------|--------------------------|-----------|-----------|-----------|-----------|-----------|
|                | 5.0                      | 6.0       | 7.0       | 8.0       | 9.0       | 10.0      |
| 4.0            | -                        | -         | -         | -         | 0.53±0.03 | 0.67±0.13 |
| 5.0            | -                        | -         | -         | -         | 0.75±0.17 | 0.49±0.01 |
| 6.0            | -                        | -         | -         | -         | 0.67±0.19 | 0.61±0.04 |
| 8.0            | 0.50±0.06                | 0.43±0.08 | 0.31±0.03 | 0.27±0.01 | 0.45±0.01 | 0.47±0.01 |
| 9.0            | 0.71±0.15                | 0.37±0.03 | 0.32±0.08 | 0.35±0.05 | 0.48±0.01 | 0.49±0.04 |
| 10.0           | 0.74±0.12                | 0.51±0.02 | 0.32±0.06 | 0.34±0.03 | 0.52±0.01 | 0.51±0.03 |
| 12.0           | 0.60±0.07                | 0.51±0.01 | 0.43±0.01 | 0.41±0.03 | 0.47±0.02 | 0.52±0.01 |

**Table S8** PDI of SB-AgNPs synthesized with different material ratio (at pH 10.0 after incubation 6.0 h)

| Extract: AgNO <sub>3</sub> | Polydispersity index/PDI |
|----------------------------|--------------------------|
| 1:1                        | 0.82±0.01                |
| 1:2                        | 0.29±0.02                |
| 1:3                        | 0.21±0.01                |
| 1:4                        | 0.21±0.02                |
| 1:5                        | 0.25±0.01                |
| 1:10                       | 0.18±0.01                |
| 1:20                       | 0.34±0.06                |

**Table S9** Zeta potential of SS-AgNPs and SB-AgNPs synthesized at different pH

| pH   | Zeta potential/mV |                  |
|------|-------------------|------------------|
|      | SS-AgNPs (5.0 h)  | SB-AgNPs (8.0 h) |
| 4.0  | -19.7±0.3         | -                |
| 5.0  | -17.6±1.3         | -23.6±1.3        |
| 6.0  | -17.6±1.3         | -26.9±0.7        |
| 7.0  | -17.8±0.9         | -31.4±3.5        |
| 8.0  | -18.5±1.5         | -35.2±3.3        |
| 9.0  | -18.6±0.9         | -34.9±4.1        |
| 10.0 | -29.7±1.2         | -34.2±2.0        |

**Table S10** Zeta potential of SB-AgNPs synthesized with different material ratio (8.0 h)

| Extract: AgNO <sub>3</sub> | Zeta potential/mV |
|----------------------------|-------------------|
| 1:1                        | -22.3±1.2         |
| 1:2                        | -20.7±0.4         |
| 1:3                        | -23.0±1.0         |
| 1:4                        | -22.0±1.0         |
| 1:5                        | -24.0±0.2         |
| 1:10                       | -22.0±0.3         |
| 1:20                       | -19.0±0.8         |
